# Supplementary material
Source: MDPI journal article supplement (https://www.mdpi.com/2079-9276/8/2/102)
Supplement: s1 [file s1]

## Supplementary Table Section

**Supplementary Table 1.** Estimated Crop Production (Million Tons per year) during 2005-2019

| Year | Maize | Rice  | Sugarcane | Oil Palm | Cassava | Coconut |
|------|-------|-------|-----------|----------|---------|---------|
| 2005 | 0.92  | 27.68 | 6.48      | 0.03     | 0.2     | 0.43    |
| 2006 | 1.03  | 30.92 | 7.69      | 0.05     | 0.21    | 0.46    |
| 2007 | 1.15  | 31.45 | 8.82      | 0.06     | 0.28    | 0.49    |
| 2008 | 1.2   | 32.57 | 9.25      | 0.06     | 0.33    | 0.51    |
| 2009 | 1.25  | 32.68 | 9.12      | 0.07     | 0.36    | 0.42    |
| 2010 | 1.35  | 32.58 | 9.25      | 0.08     | 0.37    | 0.43    |
| 2011 | 1.46  | 29.01 | 9.54      | 0.08     | 0.40    | 0.42    |
| 2012 | 1.5   | 26.22 | 9.41      | 0.09     | 0.43    | 0.49    |
| 2013 | 1.6   | 26.37 | 10.31     | 0.10     | 0.46    | 0.51    |
| 2014 | 1.69  | 26.42 | 11.13     | 0.10     | 0.50    | 0.51    |
| 2015 | 1.75  | 26.21 | 10.14     | 0.11     | 0.53    | 0.52    |
| 2016 | 1.84  | 26.21 | 10.14     | 0.12     | 0.56    | 0.53    |
| 2017 | 1.92  | 25.67 | 10.44     | 0.13     | 0.59    | 0.55    |
| 2018 | 2.01  | 25.15 | 11.27     | 0.13     | 0.62    | 0.54    |
| 2019 | 2.09  | 24.64 | 11.54     | 0.14     | 0.65    | 0.55    |

*Note: The estimation of crop production, for some of the years that the data were not sufficiently available, was made based on Asian Development Bank 2015 report [21] and Ricepedia (2000-2014) [22], Food and Agriculture Organization (FAO) [23] and the reports [24, 25] by using the linear regression model.*

**Supplementary Table 2.** Estimated Livestock and Poultry (Million heads per day) during 2005-2019

| Year | Buffalo | Cattle | Pig   | Chicken |
|------|---------|--------|-------|---------|
| 2005 | 2.7     | 12.03  | 5.94  | 83.03   |
| 2006 | 2.75    | 12.34  | 6.41  | 95.17   |
| 2007 | 2.8     | 12.66  | 6.88  | 107.31  |
| 2008 | 2.85    | 12.98  | 7.35  | 119.45  |
| 2009 | 2.9     | 13.30  | 7.82  | 131.59  |
| 2010 | 2.95    | 13.62  | 8.29  | 143.73  |
| 2011 | 3       | 13.93  | 8.76  | 155.87  |
| 2012 | 3.05    | 14.25  | 9.23  | 168.01  |
| 2013 | 3.1     | 14.57  | 9.7   | 180.15  |
| 2014 | 3.15    | 14.89  | 10.17 | 192.29  |
| 2015 | 3.2     | 15.21  | 10.64 | 204.43  |
| 2016 | 3.25    | 15.52  | 11.11 | 216.57  |
| 2017 | 3.3     | 15.84  | 11.58 | 228.71  |
| 2018 | 3.35    | 16.16  | 12.05 | 240.85  |
| 2019 | 3.4     | 16.48  | 12.52 | 252.99  |

*Note: The estimation of livestock and poultry, for some of the years that the data were not sufficiently available, was made based on Asian Development Bank 2015 report [21] by using the linear regression model.*

**Supplementary Table 3.** Estimated Fuel Wood and Waste Generation during 2005-2019

| Year | Fuel Wood<br>( Million cubic meter<br>per year) | Waste Generation<br>(Kilotons per year) |
|------|-------------------------------------------------|-----------------------------------------|
| 2005 | 31.32                                           |                                         |
| 2006 | 31.24                                           |                                         |
| 2007 | 31.16                                           |                                         |
| 2008 | 31.08                                           |                                         |
| 2009 | 31.00                                           |                                         |
| 2010 | 30.93                                           |                                         |
| 2011 | 30.85                                           |                                         |
| 2012 | 30.77                                           | 2050                                    |
| 2013 | 30.69                                           | 2482                                    |
| 2014 | 30.62                                           | 2915                                    |
| 2015 | 30.54                                           | 3347                                    |
| 2016 | 30.46                                           | 3780                                    |
| 2017 | 30.38                                           | 4212                                    |
| 2018 | 30.30                                           | 4645                                    |
| 2019 | 30.23                                           | 5078                                    |

*Note: The estimation of fuelwood, for some of the years that the data were not sufficiently available, was made based on of National Forestry Master Plan (2002-2030) [19] by using the linear regression model, however, the data related to waste generation were collected from Tun and Juchelkova (2018) [26].*
